# Supplementary material for: Investigating the Relation of Intelligence and Executive Functions in Children and Adolescents with and without Intellectual Disabilities
Source: MDPI journal article supplement (doi:10.3390/children9060818), 2022-06-01
Supplement: s1 [file s1]

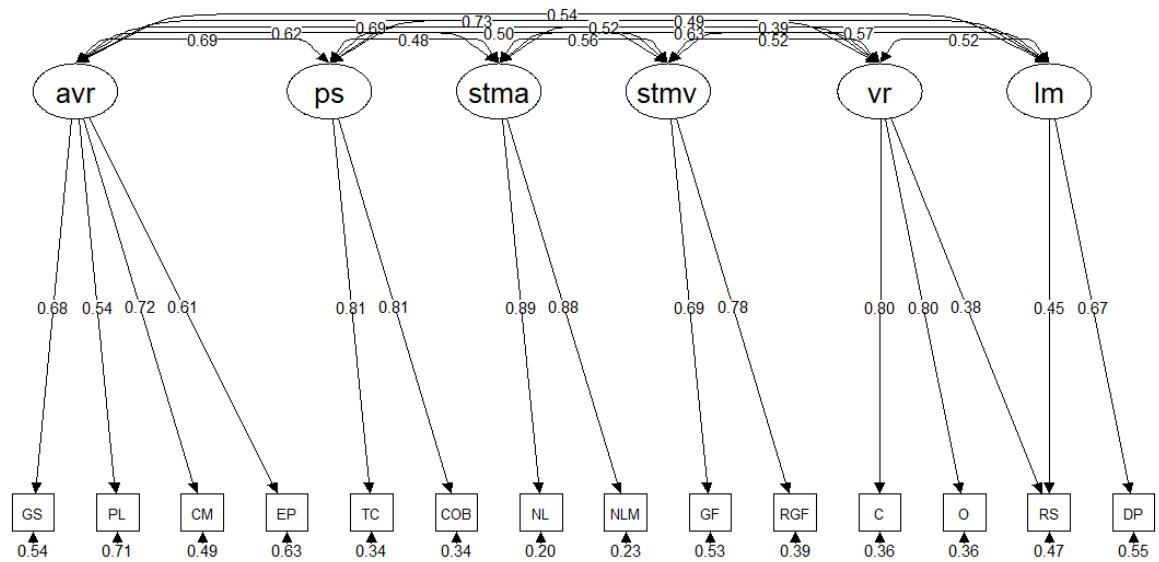

**Figure S1.** Confirmatory factor analysis of the intelligence subtests included in the Intelligence and Development Scales [22]. Latent variables are represented by ovals; manifest indicators are depicted as squares. avr = *Abstract Visual Reasoning*, ps = *Processing Speed*, stma = *Auditive Short-Term Memory*, stmv = *Visuo-Spatial Short-Term Memory*, vr = *Verbal Reasoning*, lm = *Long-Term Memory*, GS = “*Geometric Shapes*”, PL = “*Plates*”, CM = “*Completing Matrices*”, EP = “*Excluding Pictures*”, TC = “*Two Characteristics*”, COB = “*Crossing-Out Boxes*”, NL = “*Numbers/Letters*”, NLM = “*Numbers/Letters Mixed*”, GF = “*Geometric Figures*”, RGF = “*Rotated Geometric Figures*”, C = “*Categories*”, O = “*Opposites*”, RS = “*Retelling a Story*”, DP = “*Describing a Picture*”.

**Table S1.** Absolute and relative frequencies of demographic characteristics

| Characteristic                      | Full sample<br>(N = 1540) |         | BID subsample<br>(n = 255) |        |
|-------------------------------------|---------------------------|---------|----------------------------|--------|
| Gender                              |                           |         |                            |        |
| Male                                | 738                       | (47.92) | 143                        | (56.1) |
| Female                              | 802                       | (52.08) | 112                        | (43.9) |
| Age                                 |                           |         |                            |        |
| 8                                   | 163                       | (10.6)  | 61                         | (10.2) |
| 9                                   | 153                       | (9.9)   | 62                         | (7.8)  |
| 10                                  | 142                       | (9.2)   | 64                         | (10.6) |
| 11                                  | 145                       | (9.4)   | 51                         | (9.4)  |
| 12                                  | 119                       | (7.7)   | 49                         | (7.5)  |
| 13                                  | 102                       | (6.6)   | 37                         | (10.2) |
| 14                                  | 133                       | (8.6)   | 51                         | (8.2)  |
| 15                                  | 120                       | (7.8)   | 53                         | (7.5)  |
| 16                                  | 93                        | (6.0)   | 31                         | (7.1)  |
| 17                                  | 87                        | (5.6)   | 42                         | (5.5)  |
| 18                                  | 79                        | (5.1)   | 35                         | (3.5)  |
| 19                                  | 101                       | (6.6)   | 30                         | (5.9)  |
| 20                                  | 103                       | (6.7)   | 32                         | (6.7)  |
| Residency                           |                           |         |                            |        |
| Swiss                               | 820                       | (53.2)  | 91                         | (35.7) |
| German                              | 649                       | (42.1)  | 155                        | (60.8) |
| Others                              | 71                        | (4.6)   | 9                          | (3.5)  |
| Educational status (mother)         |                           |         |                            |        |
| Compulsory education                | 174                       | (11.6)  | 57                         | (34.7) |
| Upper-secondary vocational training | 561                       | (37.3)  | 261                        | (36.3) |
| Upper-secondary general education   | 91                        | (6.0)   | 34                         | (5.2)  |
| Higher vocational training          | 124                       | (8.2)   | 54                         | (4.4)  |
| Universities                        | 531                       | (35.3)  | 171                        | (15.1) |
| Unknown                             | 25                        | (1.7)   | 9                          | (4.4)  |

*Note.* BID = borderline intellectual disability ( $IQ \leq 85$ ). Percental frequencies are rounded to one decimal digit and are presented in brackets. Educational status groups according to Swiss Bundesamt für Statistik [22].

**Table S2.** Descriptive statistics of the indicators within the full sample (N = 1540)

|     | <i>M</i> | <i>SD</i> | <i>min</i> | <i>max</i> | <i>skew</i> | <i>kurtosis</i> |
|-----|----------|-----------|------------|------------|-------------|-----------------|
| GS  | 10.08    | 3.208     | 1          | 19         | -0.079      | 0.325           |
| PL  | 10.08    | 3.130     | 1          | 19         | -0.145      | 0.317           |
| RS  | 10.08    | 3.118     | 1          | 19         | -0.375      | 0.467           |
| DP  | 10.30    | 3.104     | 1          | 19         | 0.136       | 0.310           |
| TC  | 9.94     | 3.056     | 1          | 19         | -0.234      | 0.983           |
| COB | 9.95     | 3.135     | 1          | 19         | -0.082      | 0.691           |
| NL  | 10.38    | 3.243     | 1          | 19         | -0.195      | 0.509           |
| NLM | 10.39    | 3.093     | 1          | 19         | -0.251      | 0.799           |
| GF  | 10.14    | 3.047     | 1          | 19         | 0.533       | 0.522           |
| RGF | 10.11    | 3.162     | 1          | 19         | 0.251       | 0.884           |
| CM  | 10.25    | 3.194     | 1          | 19         | 0.029       | -0.104          |
| EP  | 10.20    | 3.174     | 1          | 19         | -0.116      | 0.249           |
| C   | 10.37    | 3.256     | 1          | 19         | -0.388      | 0.488           |
| O   | 10.31    | 3.061     | 1          | 19         | -0.352      | 0.665           |
| LW  | 9.83     | 3.147     | 1          | 19         | -0.096      | -0.012          |
| AC  | 9.89     | 3.090     | 1          | 19         | -0.152      | 0.157           |
| DA  | 9.94     | 2.494     | 1          | 18         | -0.413      | 0.701           |
| DR  | 10.10    | 2.567     | 1          | 17         | -0.337      | 0.052           |

*Note.* GS = “Geometric Shapes”, PL = “Plates”, RS = “Retelling a Story”, DP = “Describing a Picture”, TC = “Two Characteristics”, COB = “Crossing-Out Boxes”, NL = “Numbers/Letters”, NLM = “Numbers/Letters Mixed”, GF = “Geometric Figures”, RGF = “Rotated Geometric Figures”, CM = “Completing Matrices”, EP = “Excluding Pictures”, C = “Categories”, O = “Opposites”, LW = “Listing Words”, AC = “Animal Colors”, DA = “Divide Attention”, DR = “Drawing Routes”.

**Table S3.** Factor loadings of the exploratory factor analysis of the executive function tasks

|    | <b>PA1</b> | <b>h<sup>2</sup></b> | <b>u</b> |
|----|------------|----------------------|----------|
| LW | 0.746      | 0.556                | 0.44     |
| AC | 0.517      | 0.267                | 0.73     |
| DA | 0.905      | 0.819                | 0.18     |
| DR | 0.299      | 0.089                | 0.91     |

*Note:* The principal axis approach was used for the exploratory factor analysis. Loadings above 0.3 are in bold face. PA1 = first principal axis extracted, h<sup>2</sup> = communality, u = uniqueness. LW = “Listing Words”, AC = “Animal Colors”, DA = “Divide Attention”, DR = “Drawing Routes”.

**Table S4.** Factor loadings of the exploratory factor analysis of the executive function tasks within the (borderline) intellectual disability subsample, excluding multivariate outliers ( $n = 220$ )

|    | <b>PA1</b> | <b>h<sup>2</sup></b> | <b>u</b> |
|----|------------|----------------------|----------|
| LW | 0.738      | 0.545                | 0.455    |
| AC | 0.574      | 0.329                | 0.671    |
| DA | 0.971      | 0.943                | 0.057    |
| DR | 0.428      | 0.183                | 0.817    |

*Note:* The principal axis approach was used for the exploratory factor analysis. PA1 = first principal axis extracted, h2 = communality, u = uniqueness. LW = "Listing Words", AC = "Animal Colors", DA = "Divide Attention", DR = "Drawing Routes".

**Table S5.** Explorative analyses: maximum likelihood estimation and model fit statistics within the (borderline) intellectual disability subsample, excluding multivariate outliers ( $n = 220$ ).

| Model              | Fit indices |      |       |       |       |          |          |
|--------------------|-------------|------|-------|-------|-------|----------|----------|
|                    | $\chi^2$    | $df$ | CFI   | RMSEA | SRMR  | AIC      | BIC      |
| Measurement models |             |      |       |       |       |          |          |
| Intelligence       | 98.58       | 67   | 0.974 | 0.045 | 0.037 | 7003.44  | 7179.91  |
| EF                 | 2.47        | 2    | 0.999 | 0.030 | 0.019 | 2227.27  | 2268.00  |
| Main analyses      |             |      |       |       |       |          |          |
| M1                 | 169.80      | 120  | 0.973 | 0.040 | 0.044 | 10754.34 | 10998.69 |
| M2                 | 224.36      | 129  | 0.948 | 0.054 | 0.054 | 10792.14 | 11004.62 |
| M2a                | 436.296     | 130  | 0.830 | 0.097 | 0.206 | 11009.77 | 11218.70 |
| M2b                | 255.01      | 130  | 0.931 | 0.062 | 0.092 | 10822.70 | 11031.63 |

*Note:* The variances of the latent variables were constrained to unity to ensure model identification. Intelligence measurement model including five broad abilities in accordance with Grieder and Grob [84]. M1 = first-order CFA including six intelligence factors and one EF factor, M2 = second-order CFA: M1 additionally including the superordinate g-factor, M2a = M2 with the loading of g onto the EF factor fixed to 0, M2b = M2 with the loading of g onto the EF factor fixed to 1. CFI = comparative fit index, RMSEA = root mean square error of approximation, CI = 90% confidence interval for RMSEA, SRMR = standardized root mean square residual, AIC = Akaike's information criterion, BIC = Bayesian information criterion.
